# Supplementary material for: Flexible Fiber Membrane Based on Carbon Nanotube and Polyurethane with High Thermal Conductivity
Source: MDPI journal article supplement (doi:10.3390/nano11102504), 2021-09-26
Supplement: s1 [file s1]

## SUPPORTING INFORMATION

### Flexible Fiber Membrane Based on Carbon Nanotube and Polyurethane with High Thermal Conductivity

Yuanzhou Chen <sup>1,†</sup>, Junlin Chen <sup>1,†</sup>, Yingming Zhang <sup>1</sup>, Ziyue Hu <sup>1</sup>, Weijian Wu <sup>1</sup>, Xiang Chen <sup>1,\*</sup> and Zhifeng Hao <sup>1,2,\*</sup>

<sup>1</sup> School of Chemical Engineering and Light Industry, Guangdong University of Technology, Guangzhou 510006, China; m15521162019@163.com (Y.C.); 2112106060@mail2.gdut.edu.cn (J.C.); zhuos510@163.com (Y.Z.); huzydmn@163.com (Z.H.); w13247361677@163.com (W.W.)

<sup>2</sup> Guangdong Provincial Key Laboratory of Plant Resources Biorefinery, Guangdong University of Technology, Guangzhou 510006, China

\* Correspondence: chenxiang@gdut.edu.cn (X.C.); haozf@gdut.edu.cn (Z.H.)

† These authors contributed equally to this work.

Fourier transform infrared (FTIR) spectra measurements were performed with a resolution of 4 cm<sup>-1</sup> and a range from 500 to 4000 cm<sup>-1</sup> via KBr pressed disc technique.

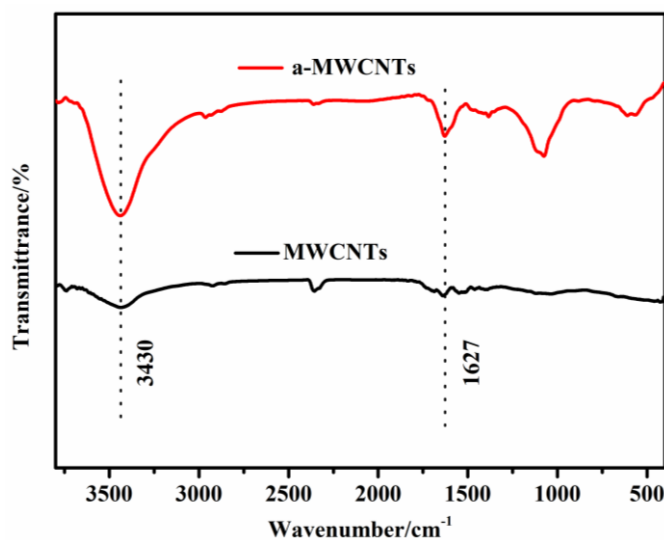

Figure S1 FTIR spectra of MWCNTs and a-MWCNTs.

**Table S1** A comparison of the enhancement of thermal conductivity for CNTs-

based film-like composites.

| Filler loading | Polymeric matrix | $\lambda$ (W/mK) | Enhancement (%) | Ref.     |
|----------------|------------------|------------------|-----------------|----------|
| 2 wt% MWCNTs   | PAN              | 4.825            | 234             | [28]     |
| 35.3 wt% CNTs  | NFC              | 19.3             | 1135            | [36]     |
| 15 wt% CNTs    | PVDF             | 1.12             | 747             | [37]     |
| 4 wt% MWCNTs   | PI               | 0.63             | 461             | [38]     |
| 10 wt% MWCNTs  | PA6              | 1.159            | 232             | [39]     |
| 5 wt% CNTs     | EP               | 1.0              | 441             | [19]     |
| 10 wt% MWCNTs  | TPU              | 3.60             | 1800            | Our work |
